# Supplementary material for: Influence of non-spectral matrix effects on the accuracy of Pb isotope ratio measurement by MC-ICP-MS: implications for the external normalization method of instrumental mass bias correction
Source: Royal Society of Chemistry journal article supplement (doi:10.1039/b717418g), 2008-01-01
Supplement: b717418g.pdf [file b717418g.pdf]

**Electronic Supplementary Information.** Table of Standard Instrument Running Conditions.

---

|                            |                                                 |
|----------------------------|-------------------------------------------------|
| <b>Instrument</b>          | <b>Nu Plasma MC-ICP-MS</b>                      |
| RF power                   | 1300 W                                          |
| Reflected power            | <10 W                                           |
| Accelerating potential     | 4000 V                                          |
| Analyser pressure          | < 4 x 10 <sup>-9</sup> mbar under full gas load |
| Abundance sensitivity      | 3 – 4 ppm                                       |
| Cones                      | Ni (Nu Plasma Type B)                           |
| <u>Argon gas flows:</u>    |                                                 |
| - coolant                  | 13 l min <sup>-1</sup>                          |
| - auxiliary                | 0.70 l min <sup>-1</sup>                        |
| - nebuliser                | 35 – 40 psi                                     |
| <b>Sample introduction</b> | <b>Nu Plasma DSN 100</b>                        |
| - hot gas flow             | 0.25 l min <sup>-1</sup>                        |
| - membrane gas flow        | 2.7 – 3.1 l min <sup>-1</sup>                   |
| - nebuliser                | ESI PFA µflow                                   |
| - sample uptake rate       | 70 - 80 µl min <sup>-1</sup>                    |

---
